# Supplementary material for: The geography of measles vaccination in the African Great Lakes region
Source: PubMed Central journal article supplement (PMC5458501; doi:10.1038/ncomms15585), 2017-05-25
Supplement: ncomms15585-s1.pdf [file ncomms15585-s1.pdf]

## Supplementary Figures

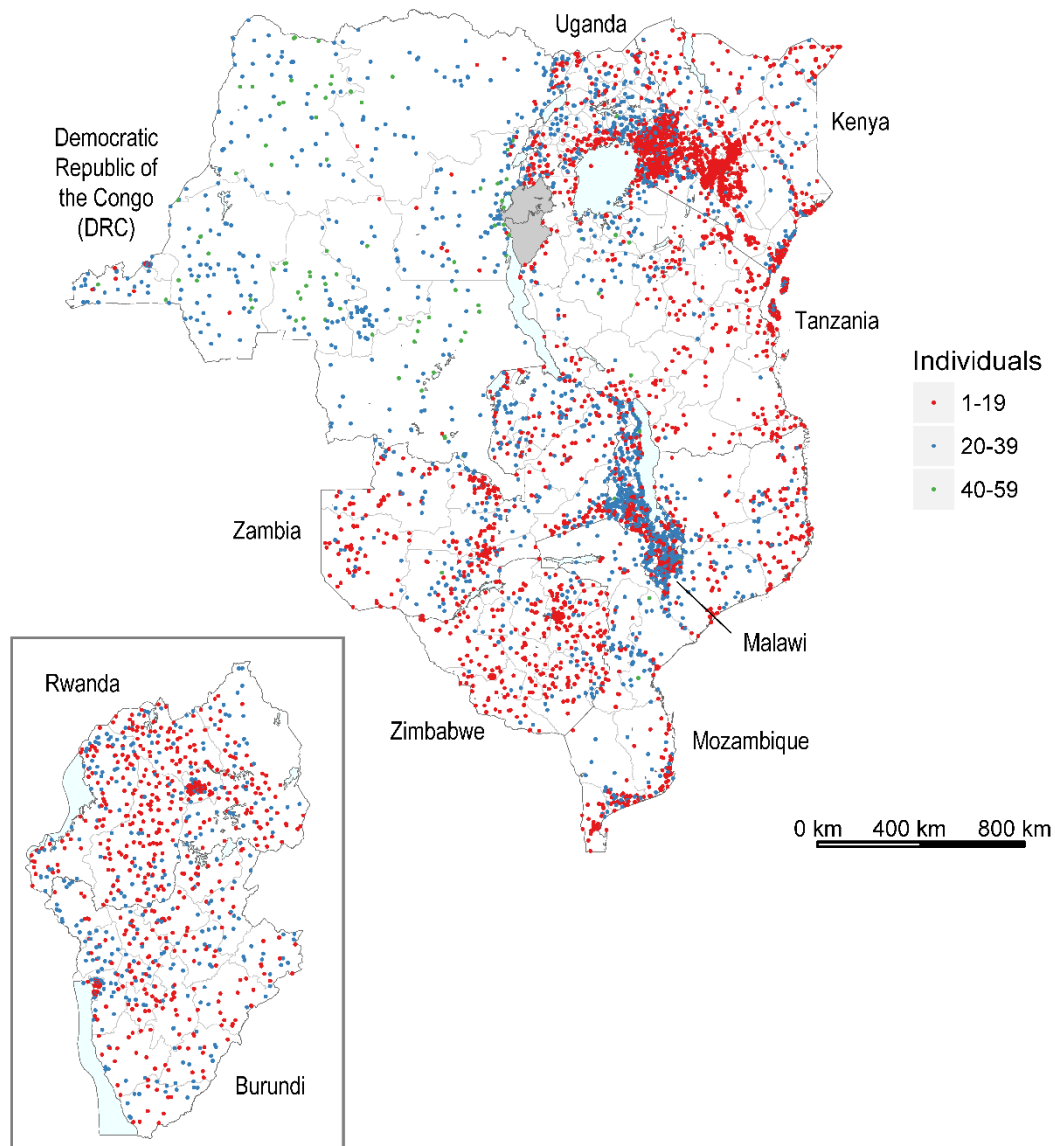

Supplementary Fig. 1: **Map of the ten countries included in the analysis.** Showing the first sub-national administrative boundaries in light grey, and DHS survey locations representing clusters of 1-19 children (red), 20-39 children (blue), and 40-59 children (green) under 60 months of age. Inset: DHS survey locations in Rwanda and Burundi.

(a)

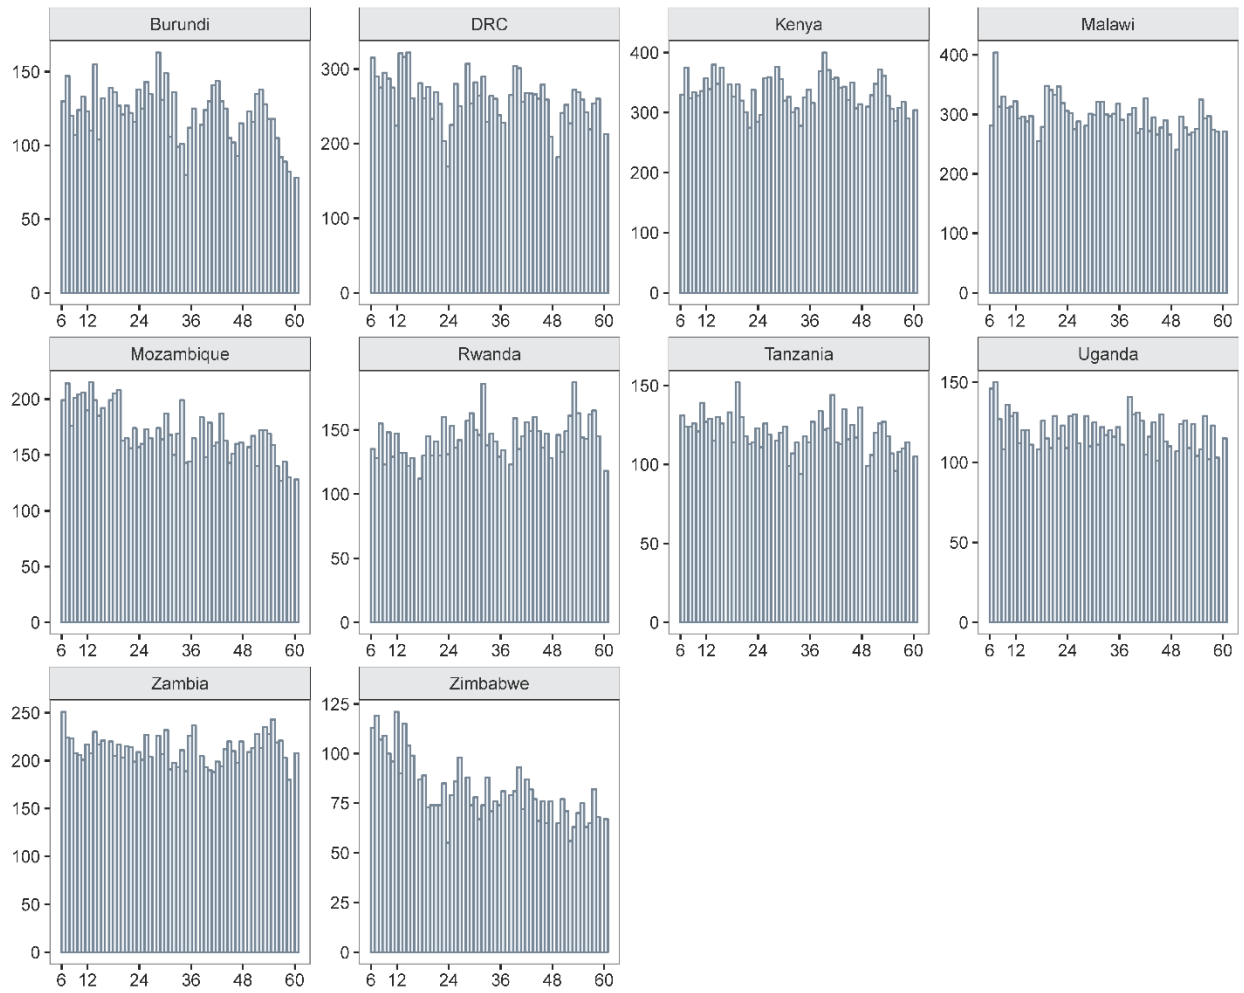

(b)

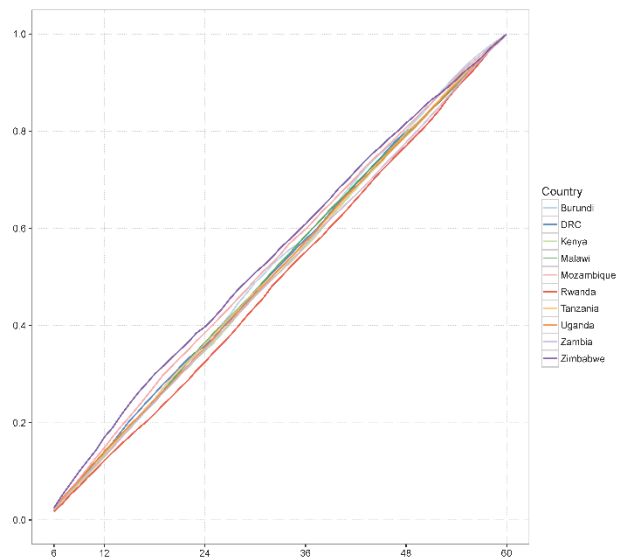

Supplementary Fig. 2: **Age distribution of DHS survey age, by country. (a)** Frequency and **(b)** cumulative distribution of children's age (x-axis, in months between 6-60) at DHS survey by country.

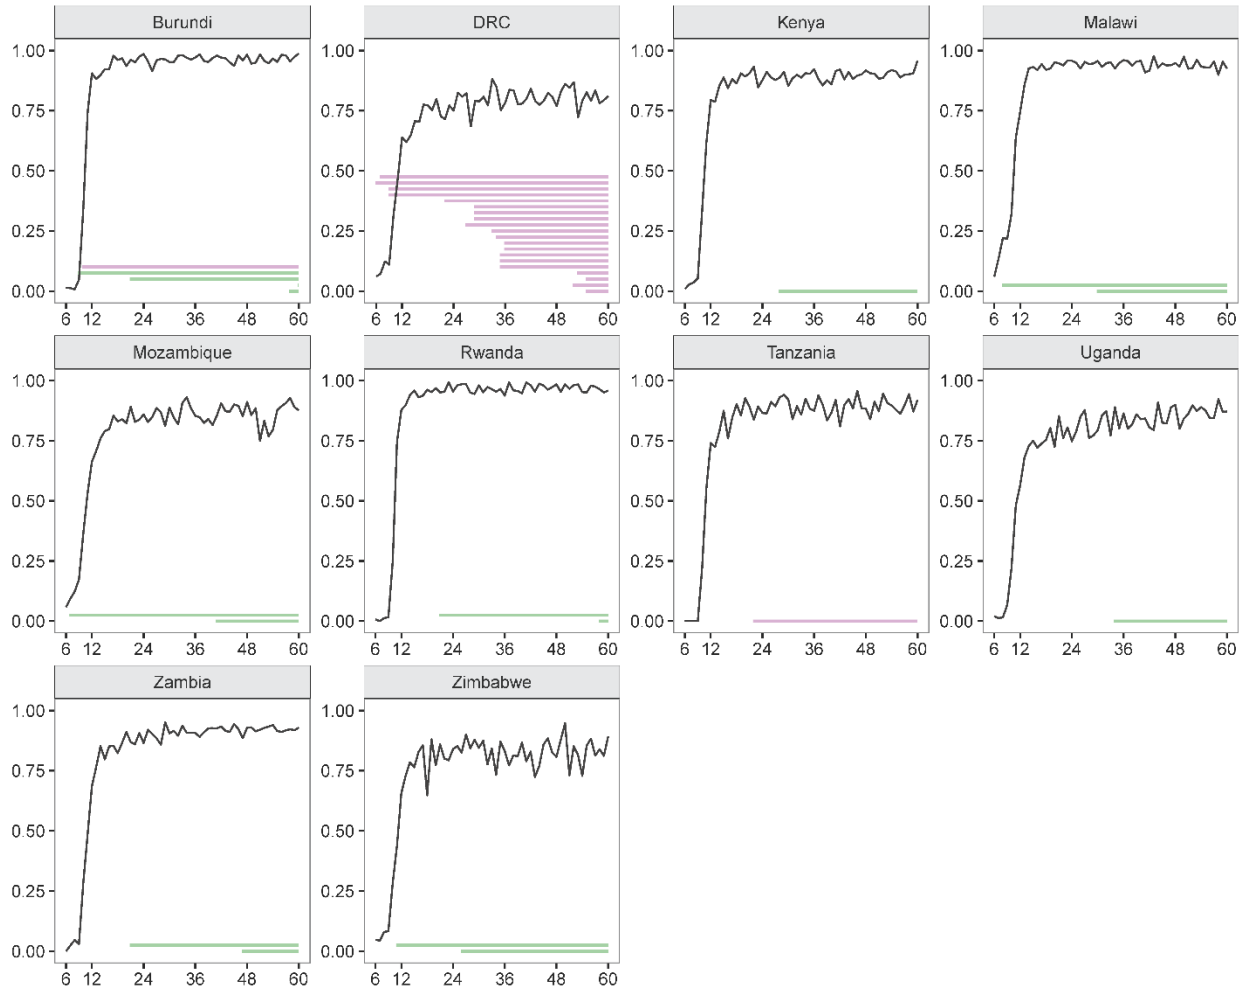

Supplementary Fig. 3: **Empirical measles vaccination coverage by DHS survey age and country.** Proportion of children who received any measles vaccination at survey age (x-axis, in months between 6-60) by country, with DHS sample weights. Colored bars indicate the range of age-eligibility for national (green) and sub-national (pink) measles SIA campaigns.

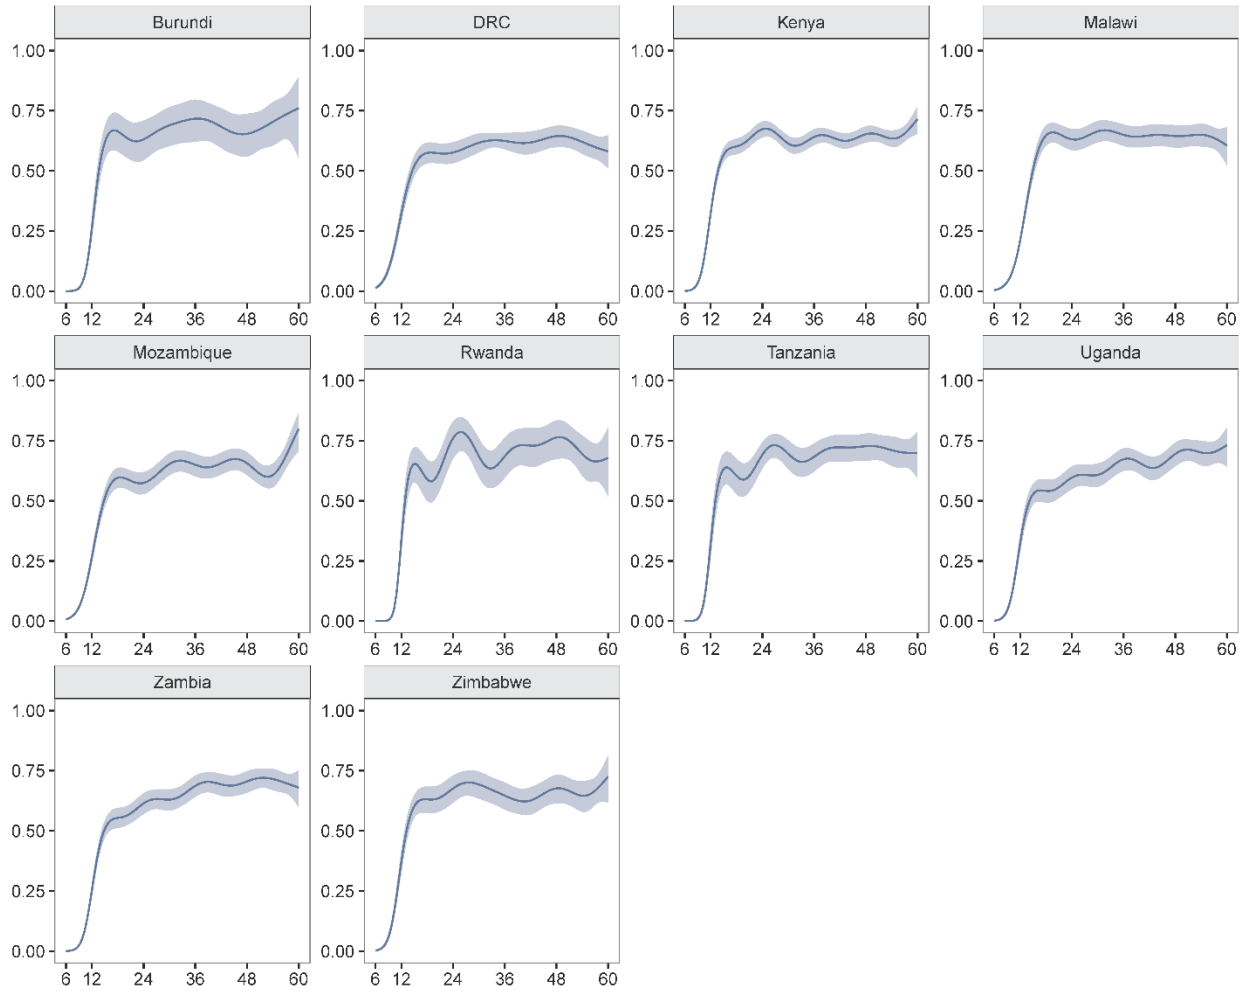

Supplementary Fig. 4: **Smoothed effect of DHS survey age, by country.** Estimated marginal effect of DHS survey age (x-axis, in months between 6-60) by country on the probability of either receiving routine measles vaccination or being vaccinated during a national measles SIA campaign (y-axis) based on the full GAM model, with error bands showing +1 and -1 standard errors.

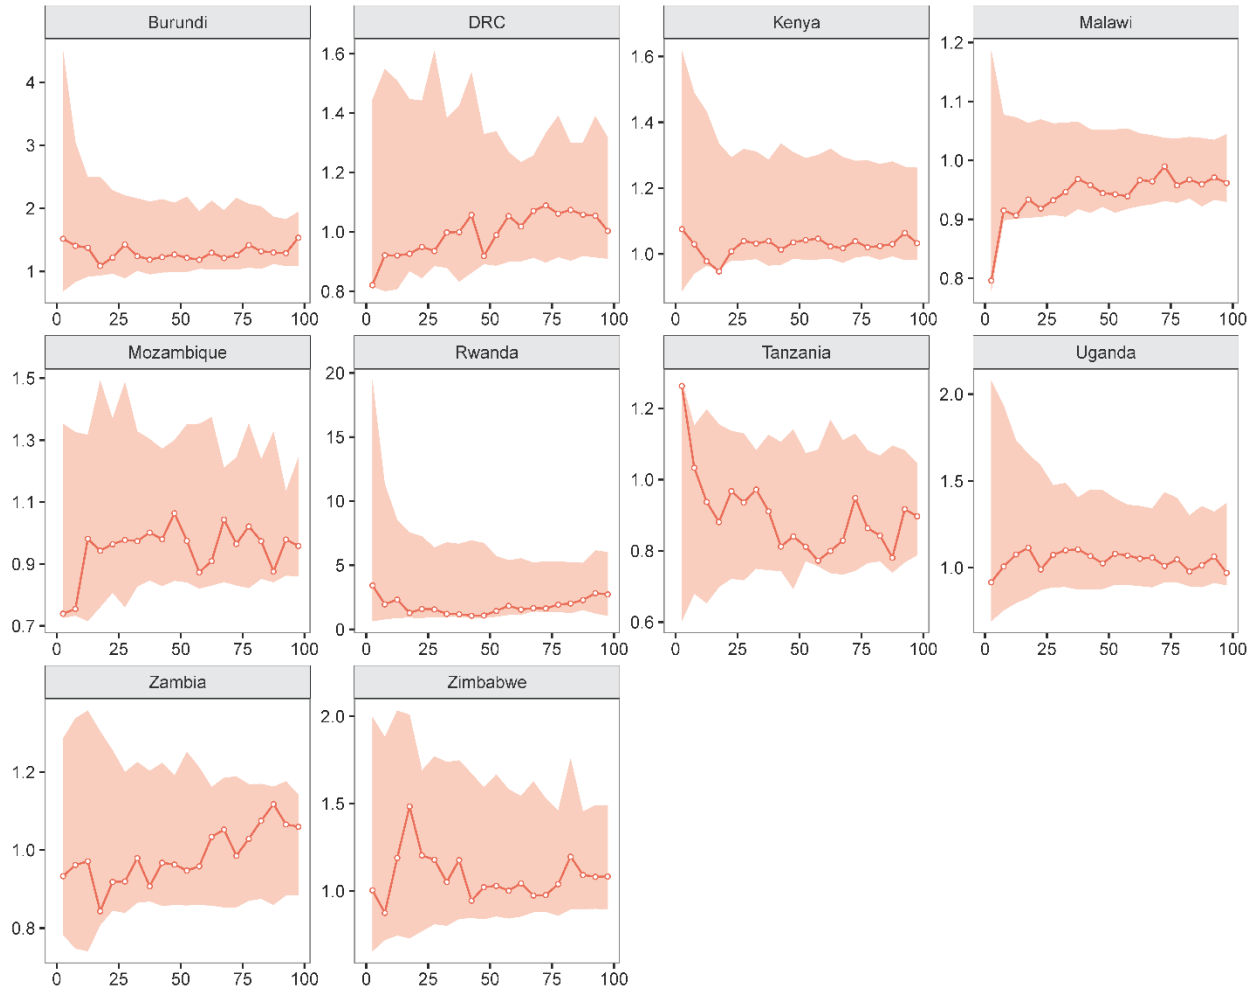

Supplementary Fig. 5: **Variogram of full GAM model residuals, by country.** Empirical omnidirectional variogram of standardized residuals at each DHS cluster by distance (x-axis, in km) up to 100 km by country, using the method of moments estimator in the R package *geor*. The empirical variogram envelope (light orange) for each country is constructed using 5,000 simulations: in each simulation, standardized residual values are randomly permuted across the spatial locations, and the envelope shows the minimum and maximum value of the variogram by country for the simulated data (i.e., the envelope is constructed under the assumption of no residual spatial autocorrelation).

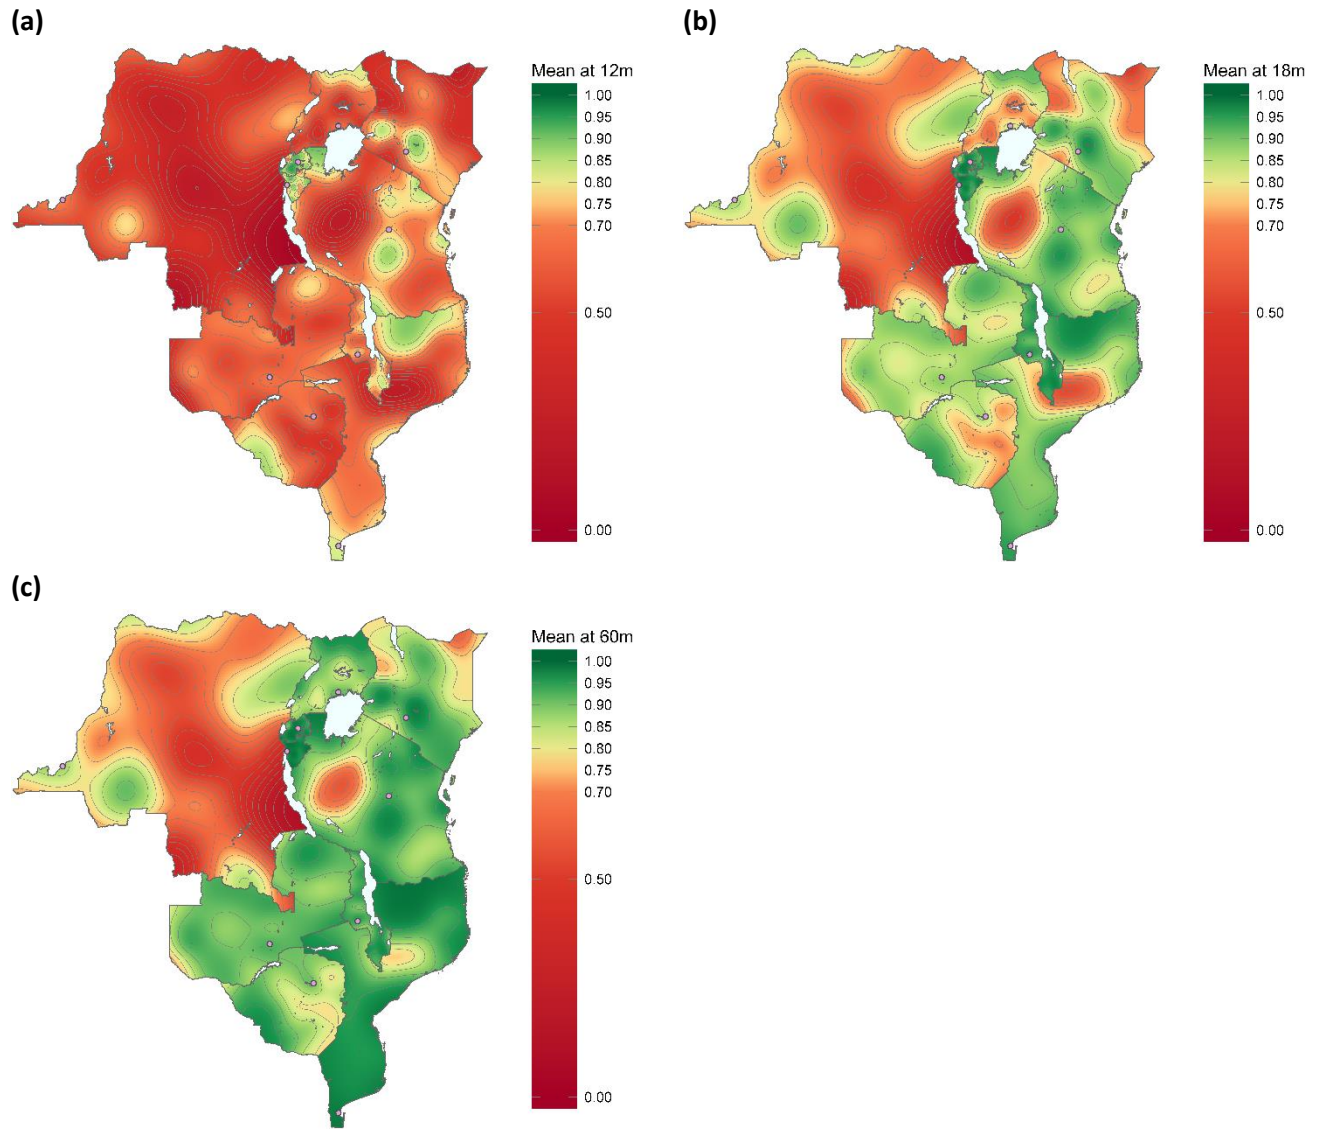

Supplementary Fig. 6: **Vaccination coverage by age.** Estimated mean proportion of children **(a)** 12 months of age, **(b)** 18 months of age, and **(c)** 60 months of age who have either received routine measles vaccination or were vaccinated during a national measles SIA campaign. Contour lines are marked at every 0.05 level. Capital cities are shown as pink circles.

**(a)**

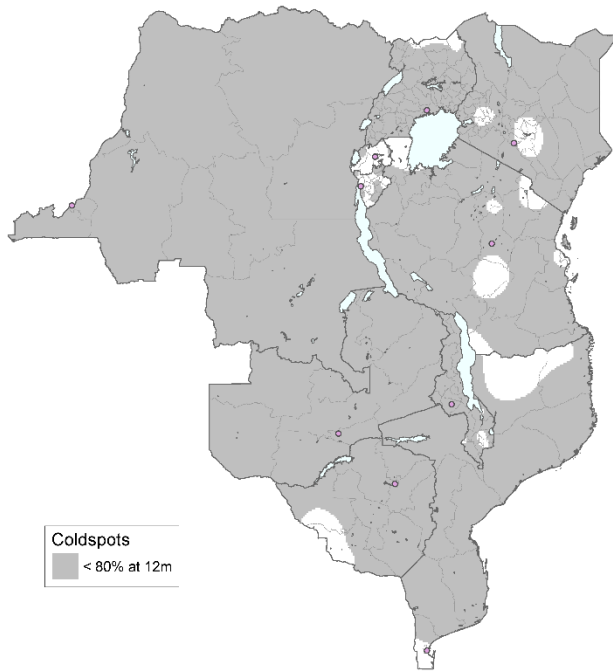

**(b)**

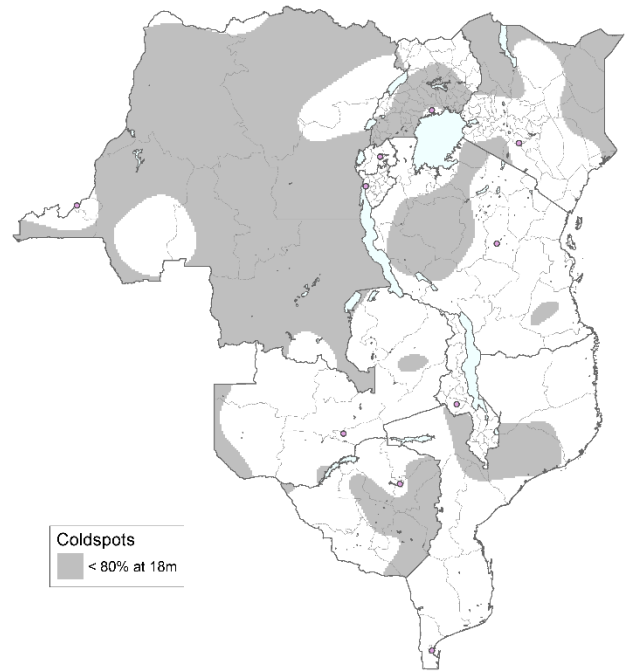

**(c)**

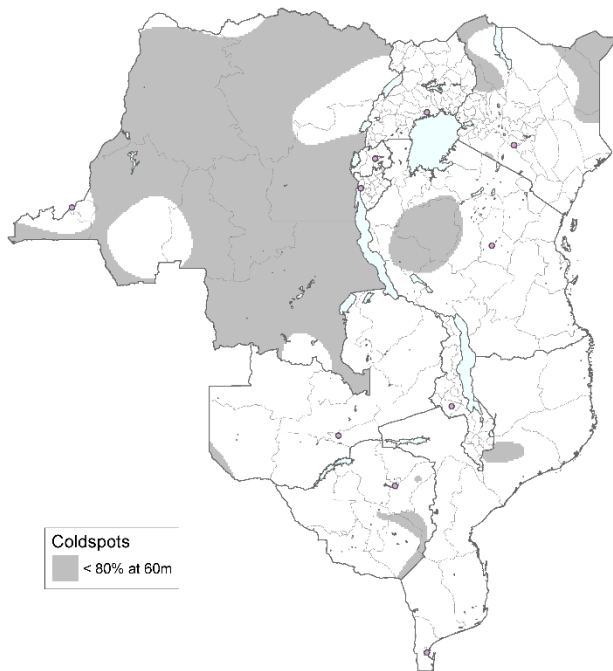

Supplementary Fig. 7: **Coldspots by age.** Estimated coldspots (defined as below 80% estimated mean measles vaccination coverage) of routine and national SIA measles vaccination for children **(a)** 12 months of age, **(b)** 18 months of age, and **(c)** 60 months of age. Capital cities are shown as pink circles. The first sub-national political boundaries are shown in light grey.

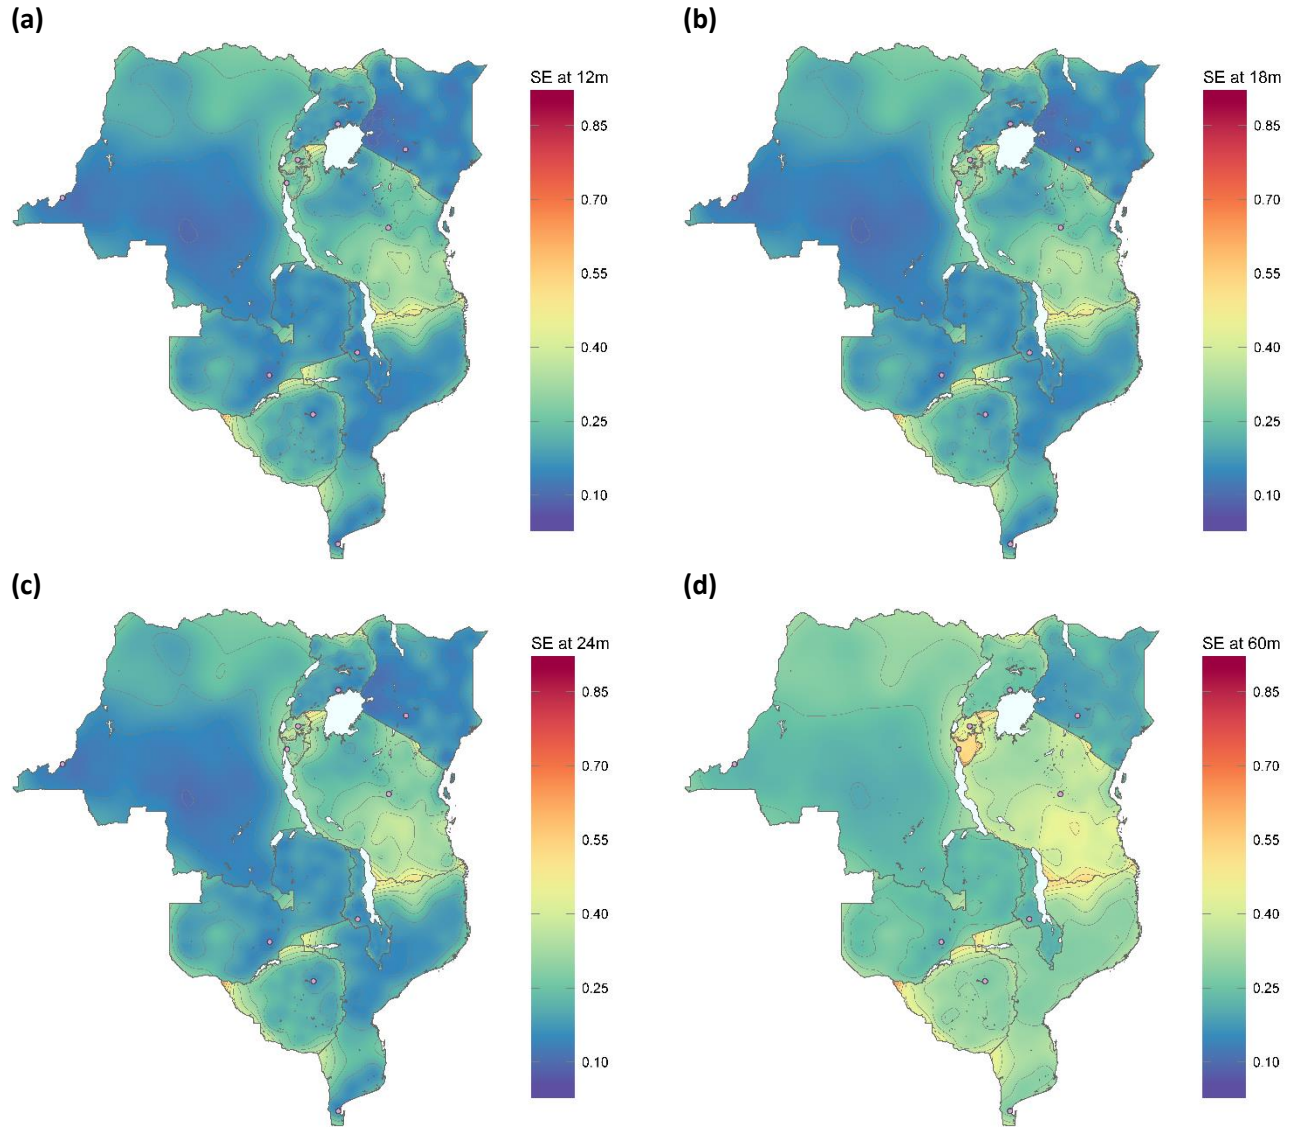

Supplementary Fig. 8: **Standard error of vaccination coverage by age.** Estimated standard error of the mean proportion of children **(a)** 12 months of age, **(b)** 18 months of age, **(c)** 24 months of age, and **(d)** 60 months of age who have either received routine measles vaccination or were vaccinated during a national measles SIA campaign, on the logit scale. Contour lines are marked at every 0.05 level. Capital cities are shown as pink circles.



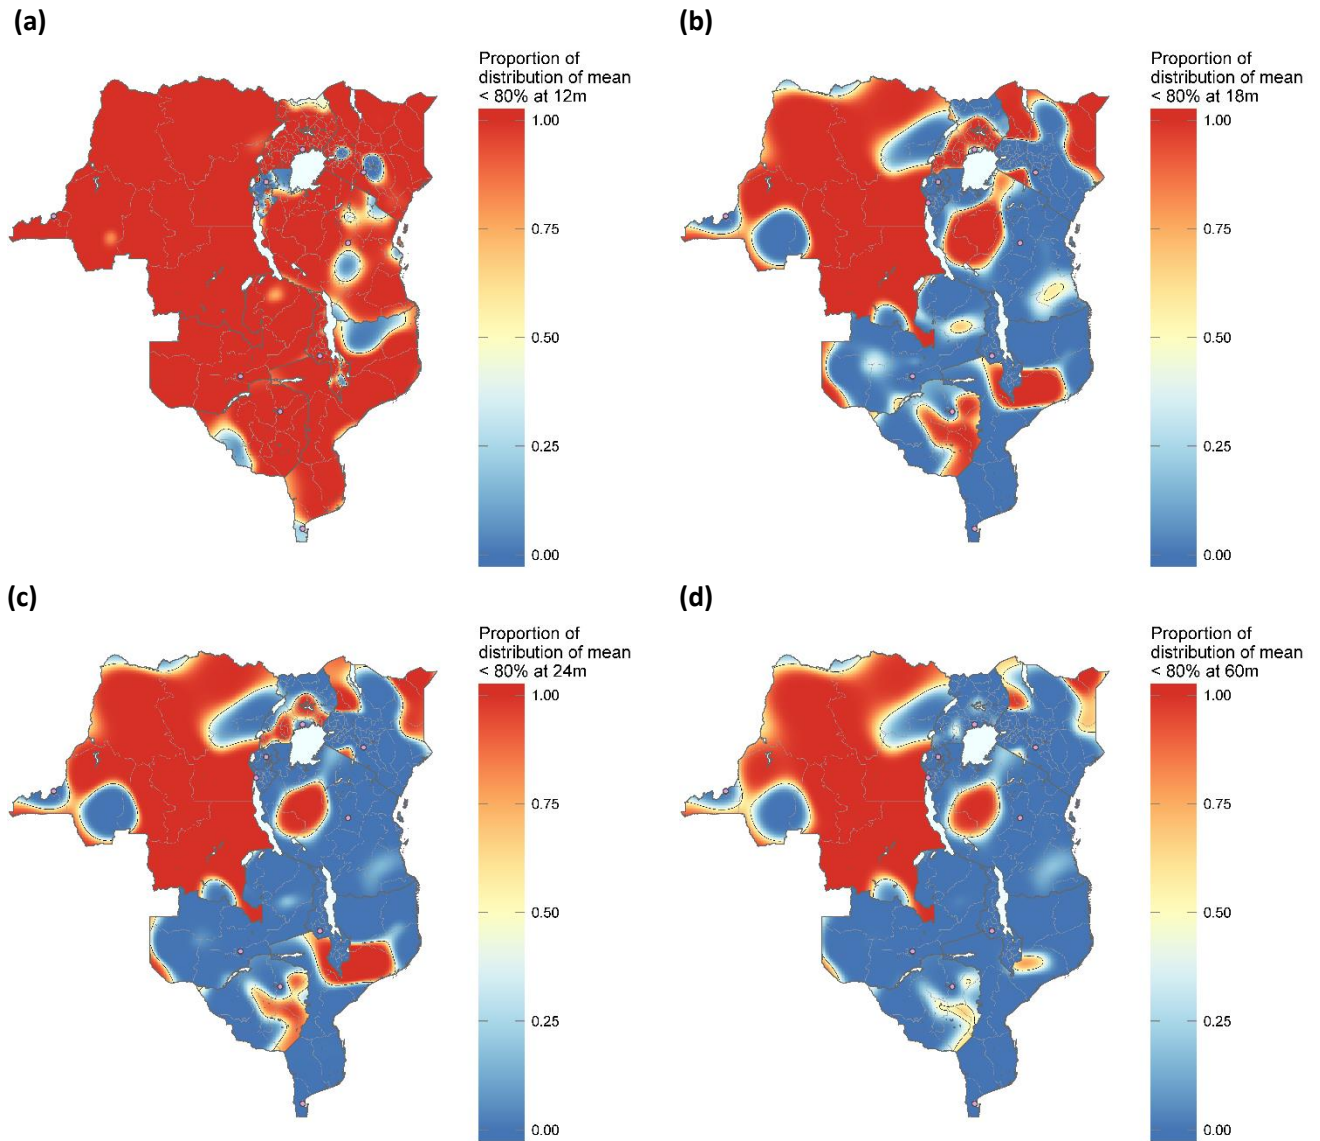

Supplementary Fig. 9: **Confidence in being a coldspot of vaccination coverage by age.** Proportion of the distribution of estimated mean measles vaccination coverage at **(a)** 12 months of age, **(b)** 18 months of age, **(c)** 24 months of age, and **(d)** 60 months of age that is below 80% (i.e., estimated to be a coldspot of routine and national SIA measles vaccination). The distribution of mean coverage at each grid cell is assumed to be normal, and is generated from the estimates and the standard errors of full GAM model predictions, on the logit scale. Grid cells that are coldspots with high certainty are colored in red, grid cells that are not coldspots with high certainty are colored in blue, and grid cells with low certainty of (not) being coldspots are colored in yellow. The first sub-national political boundaries are shown in light grey. The outline of the estimated coldspots (defined as below 80% estimated mean measles vaccination coverage, see Fig. 1b and Supplementary Fig. 7) is shown in black. Capital cities are shown as pink circles. The first sub-national political boundaries are shown in light grey.

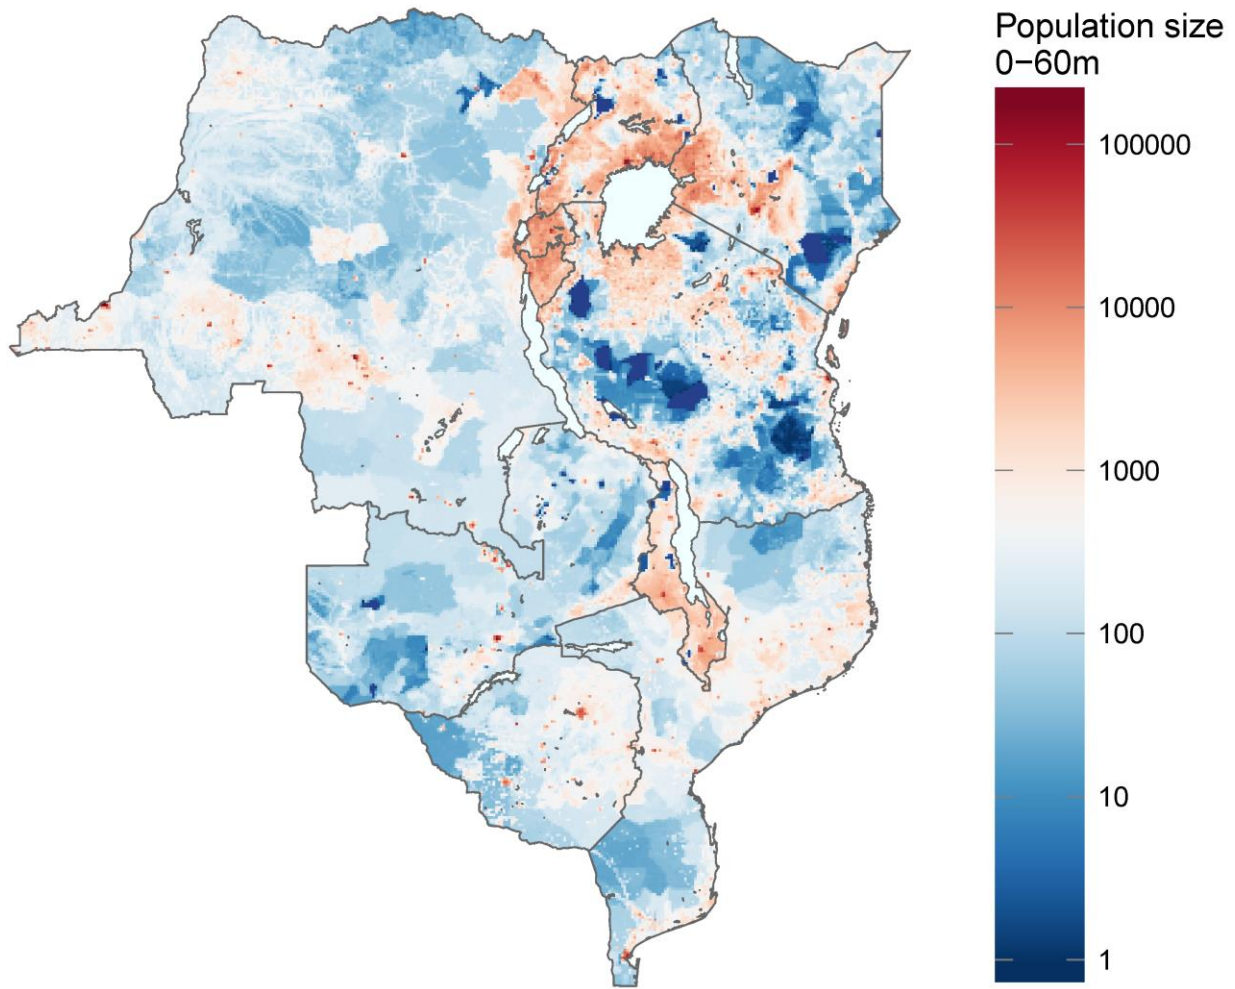

Supplementary Fig. 10: **Population density in the African Great Lakes region.** Estimated number of children 0-60 months of age per 10 km by 10 km grid cell, from the WorldPop project. Dark blue grid cells have estimated zero population density.

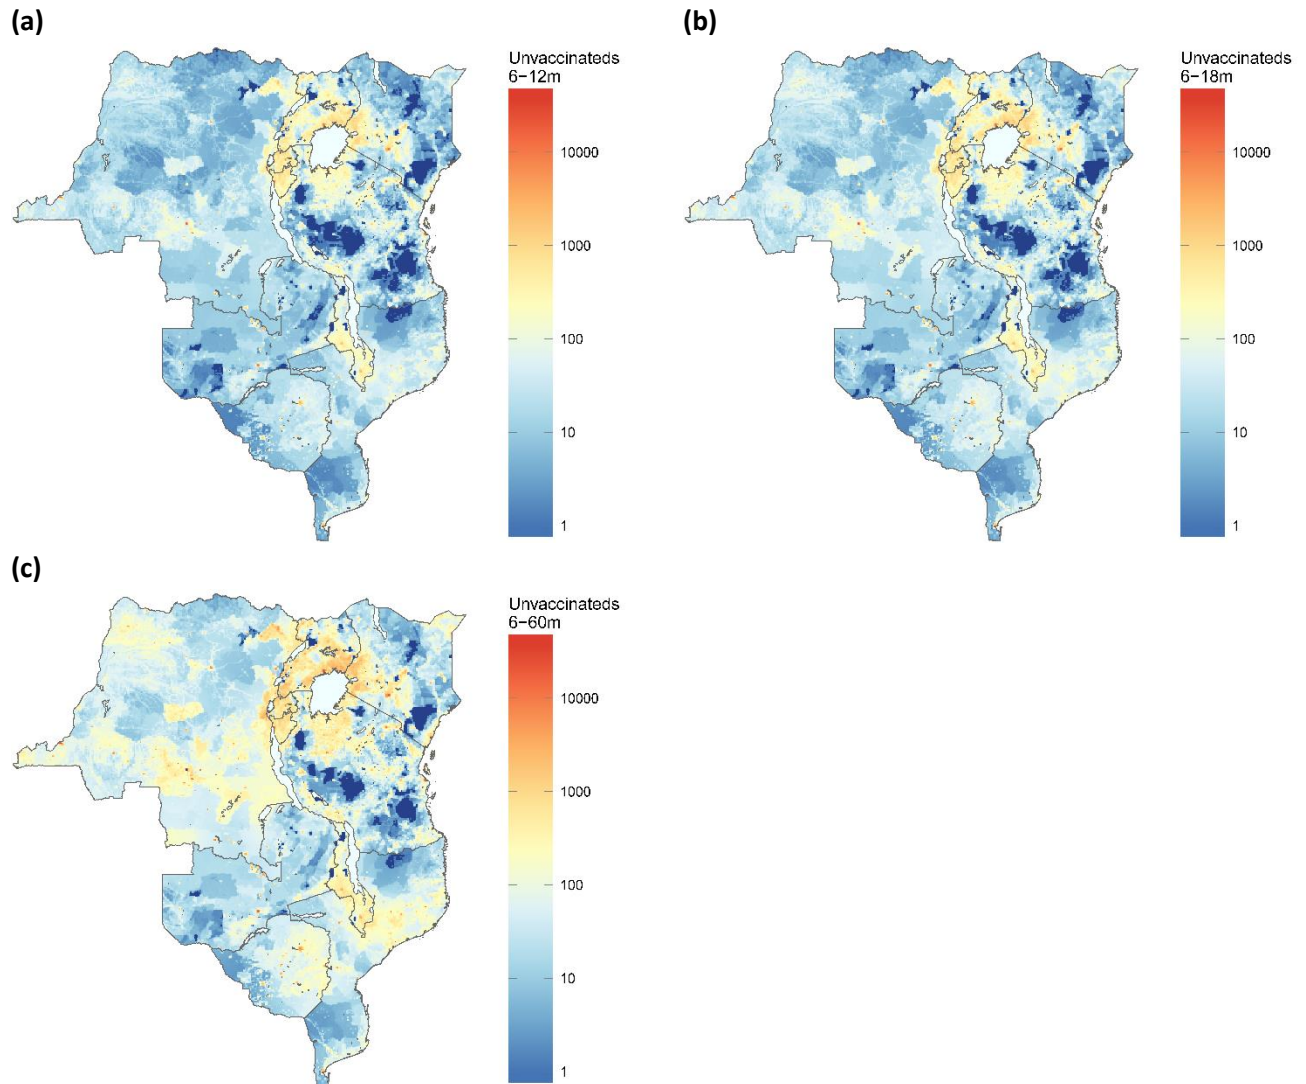

Supplementary Fig. 11: **Unvaccinated children by age.** Estimated number of children **(a)** 6-12 months of age, **(b)** 6-18 months of age, and **(c)** 6-60 months of age per 10 km by 10 km grid cell who have neither received routine measles vaccination nor were vaccinated during a national measles SIA campaign. Dark blue grid cells have estimated zero population density.

(a)

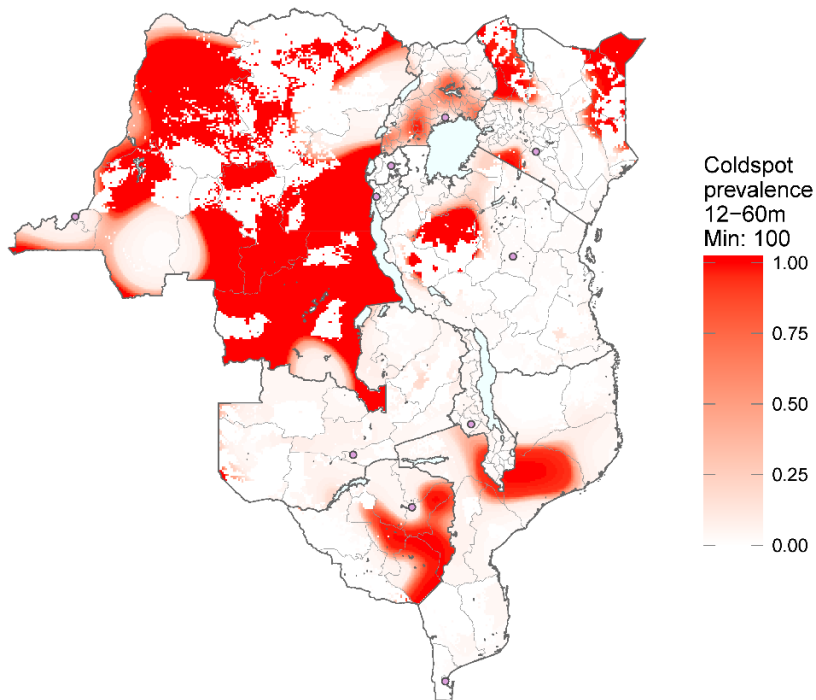

(b)

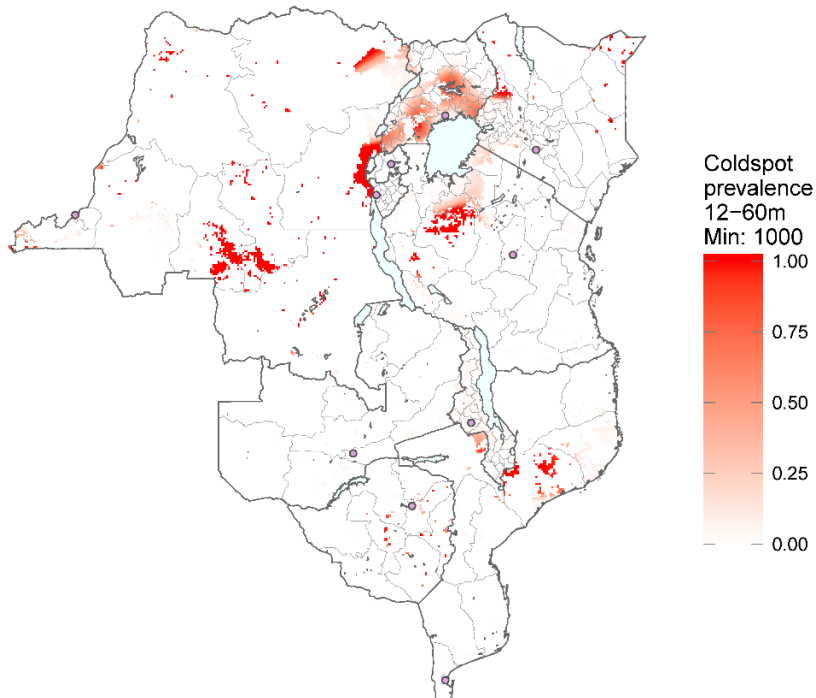

Supplementary Fig. 12: **Vaccination coldspots and varying thresholds of population density.** Estimated proportion of monthly age cohorts that each 10 km by 10 km grid cell exists as a coldspot of routine and national SIA measles vaccination for children between 12-60 months of age (total of 49 monthly age cohorts), showing only grid cells with **(a)** at least 100 children under 60 months of age and **(b)** at least 1,000 children under 60 months of age. Capital cities are shown as pink circles. The first sub-national political boundaries are shown in light grey.

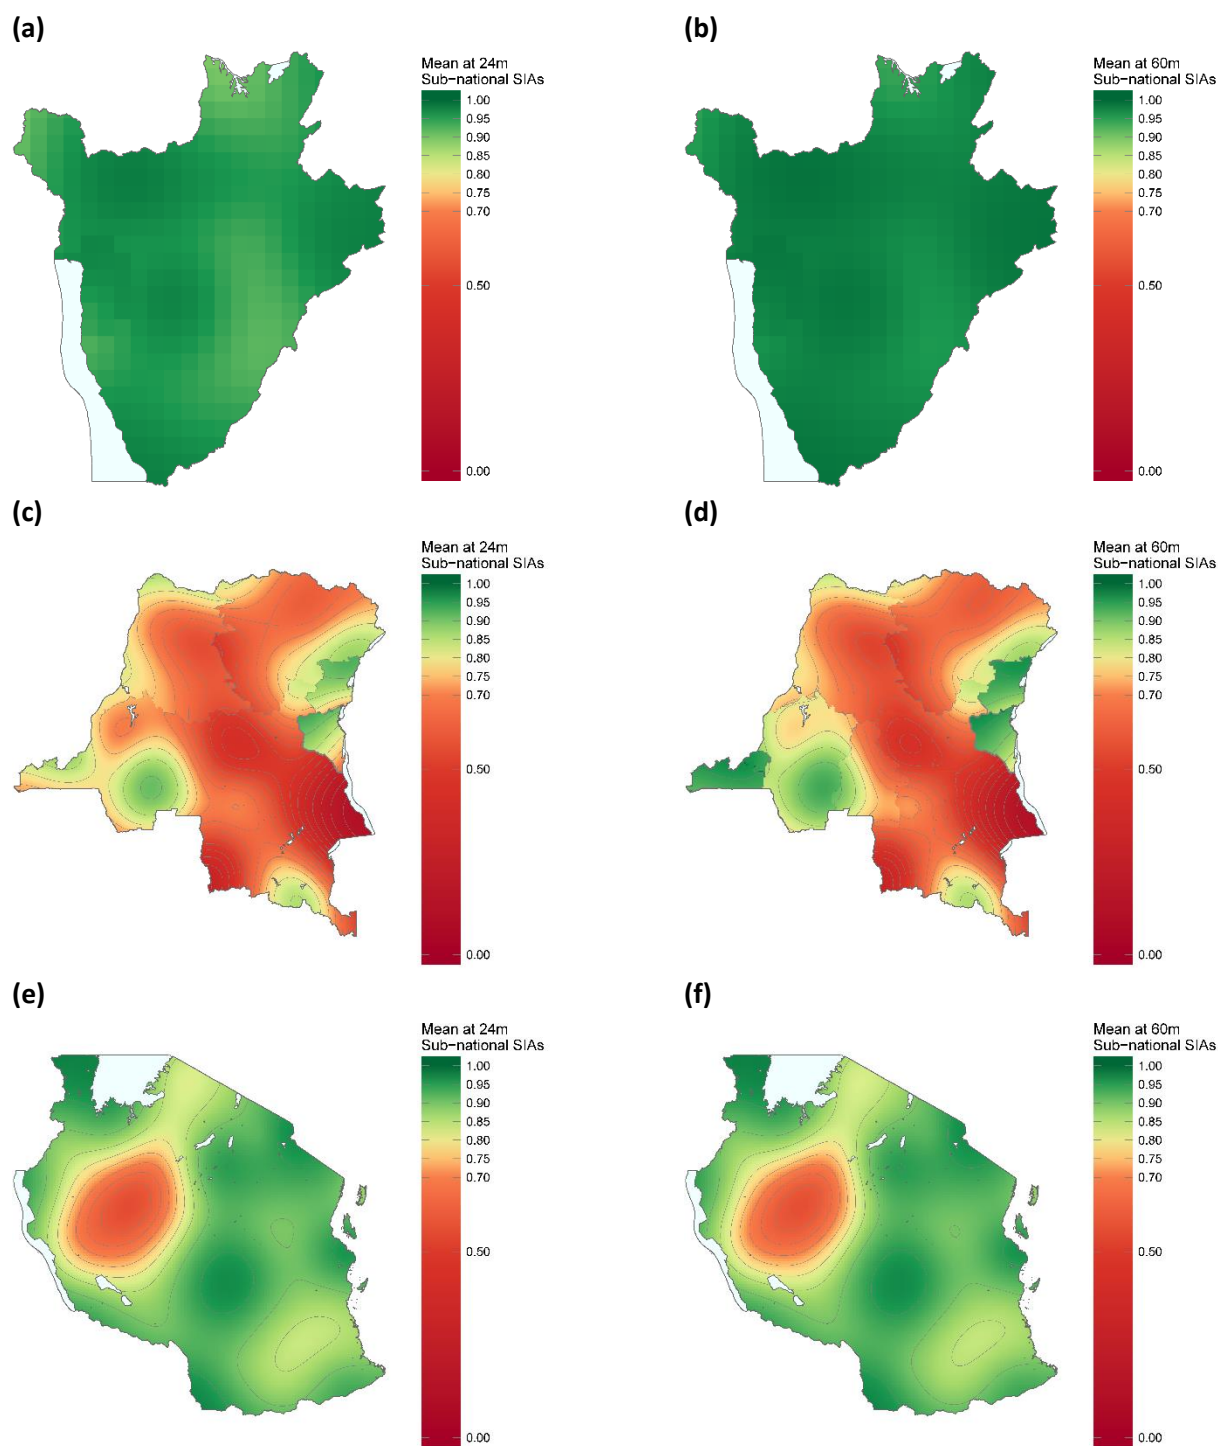

Supplementary Fig. 13: **Vaccination coverage by age, including the impact of sub-national SIA campaigns.** Estimated mean proportion of children 24 months of age in (a) Burundi, (c) DRC, and (e) Tanzania, and 60 months of age in (b) Burundi, (d) DRC, and (f) Tanzania, who have received routine measles vaccination or were vaccinated during a national or sub-national measles SIA campaign, with sub-national SIA eligibility determined by age and location (see Supplementary Table 4). Contour lines are marked at every 0.05 level.

(a)

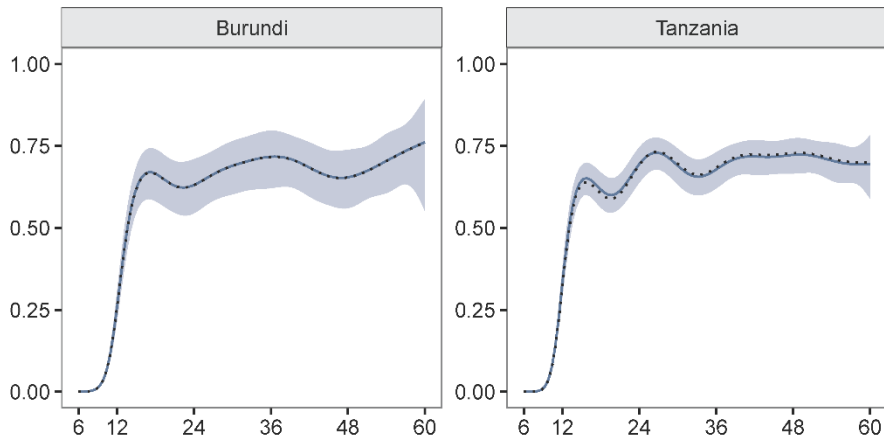

(b)

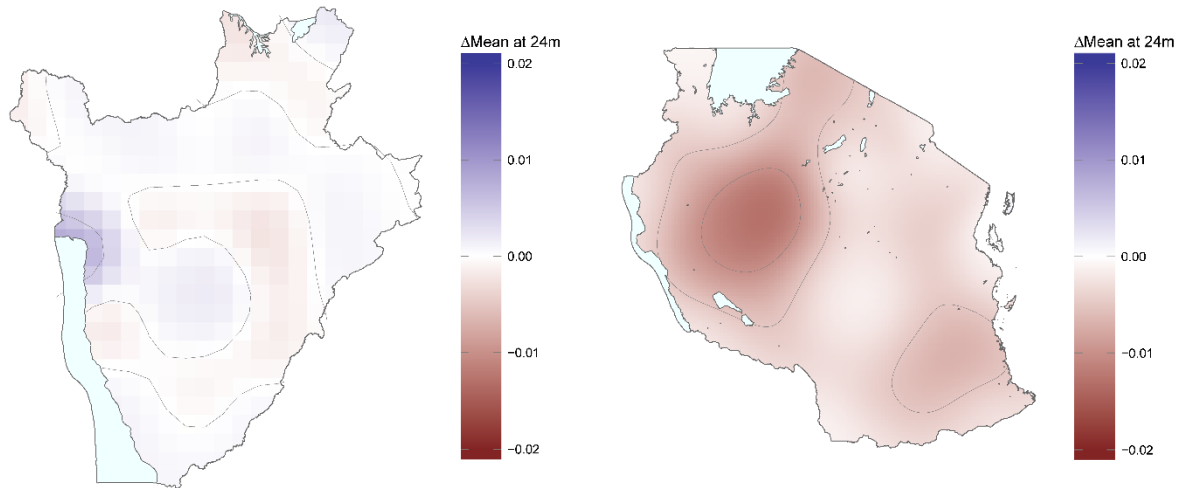

(c)

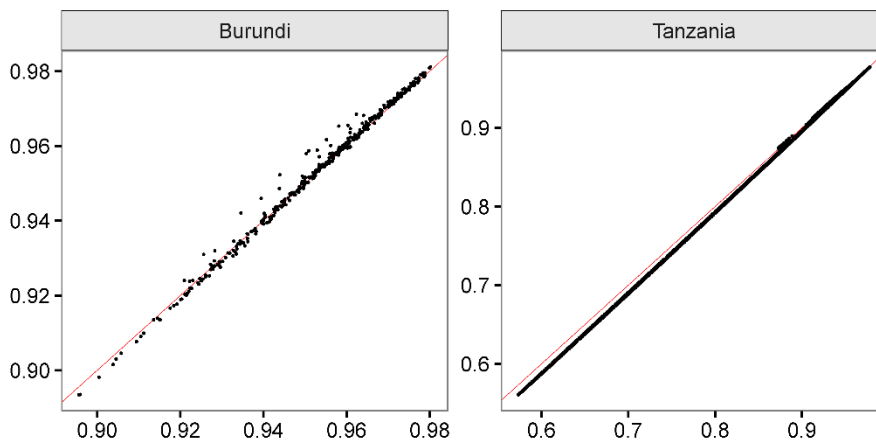

Supplementary Fig. 14: **Comparison of models with and without the sub-national SIA covariate in Burundi and Tanzania.** (a) Estimated marginal effect of DHS survey age (x-axis, in months between 6-60) on the probability of either receiving routine measles vaccination or being vaccinated during a national measles SIA campaign (y-axis) based on the GAM model without the sub-national SIA covariate ('C1

model' from Supplementary Table 1), with error bands showing +1 and -1 standard errors (blue). Estimate using the GAM model with the sub-national SIA covariate ('full model' from Supplementary Table 1; this model was used in the main analysis) shown in black dotted line. **(b)** Difference in estimated mean proportion of children 24 months of age who have either received routine measles vaccination or were vaccinated during a national SIA measles vaccination based on the C1 model, from the value based on the full model, in Burundi (left) and Tanzania (right). Contour lines are marked at every 0.005 level. **(c)** Estimated mean proportion of children 24 months of age who have either received routine measles vaccination or were vaccinated during a national measles SIA campaign, using the value based on the full model (x-axis) and the value based on the C1 model (y-axis), at each 10 km by 10 km grid cell with the  $y = x$  line shown in red. Note that the full model was chosen a priori based on the assumed epidemiological impact of sub-national SIA campaigns.

(a)

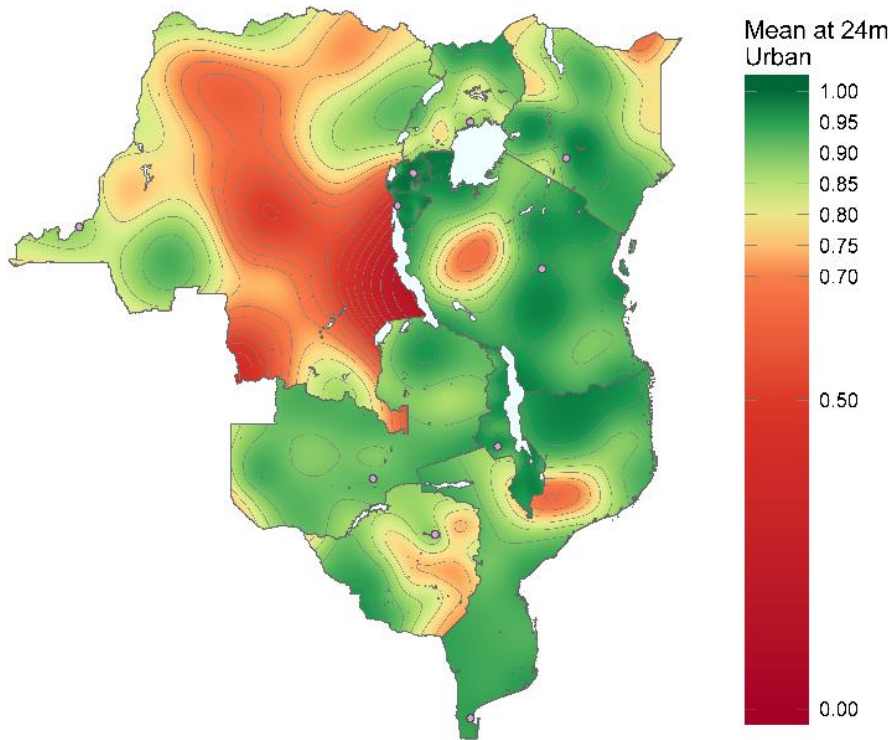

(b)

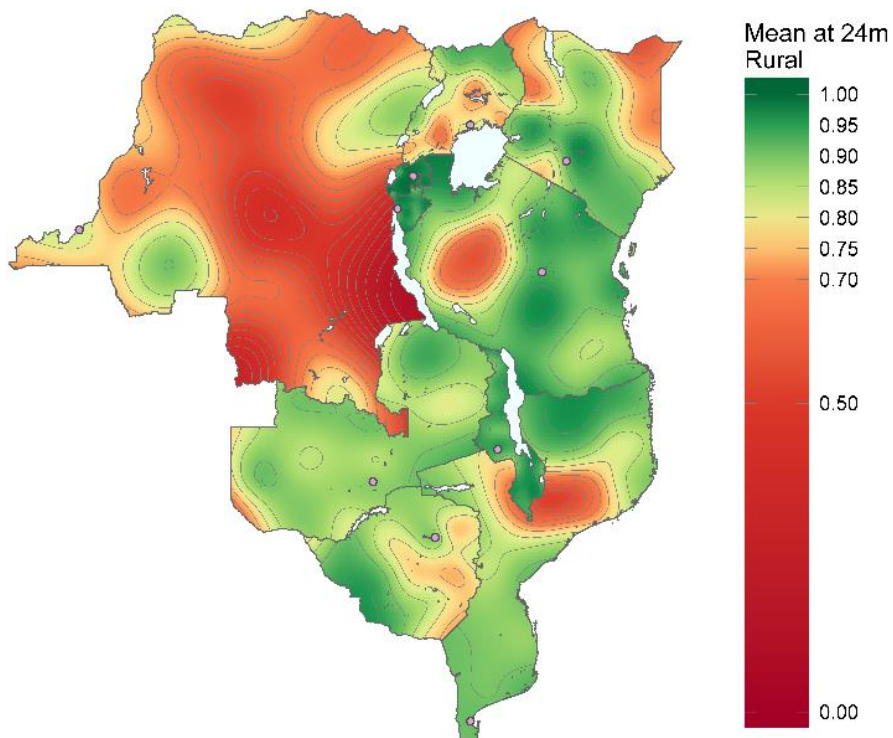

Supplementary Fig. 15: **Vaccination coverage and urbanicity.** Estimated mean proportion of children 24 months of age who have either received routine measles vaccination or were vaccinated during a national measles SIA campaign, assuming all grid cells are (a) urban or (b) rural. Contour lines are marked at every 0.05 level. Capital cities are shown as pink circles.



(a)

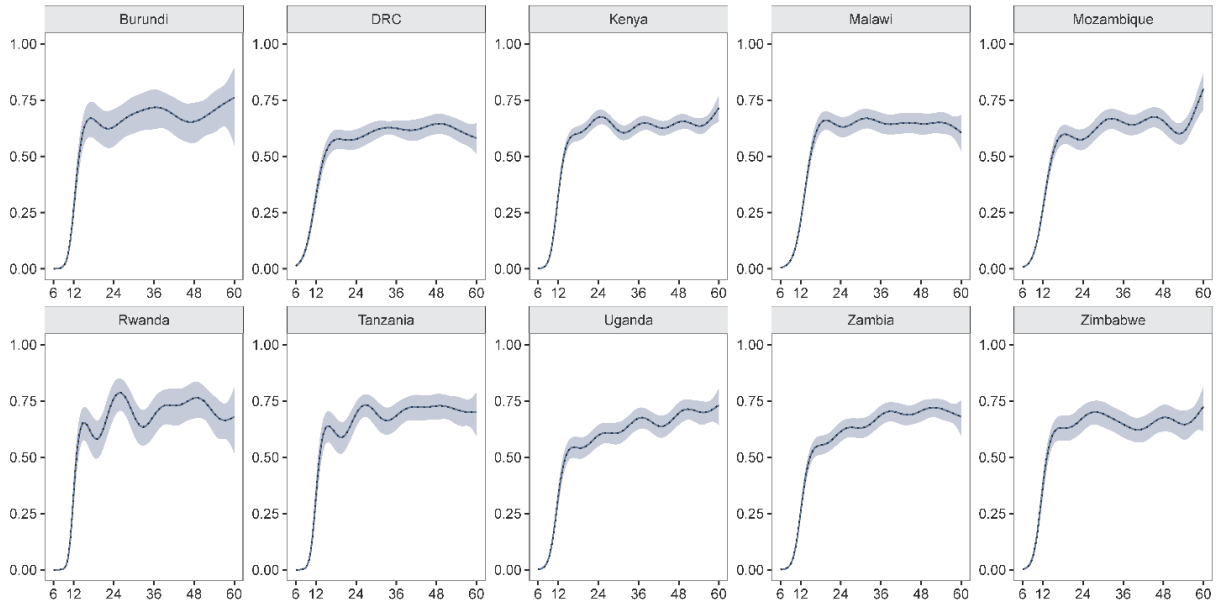

(b)

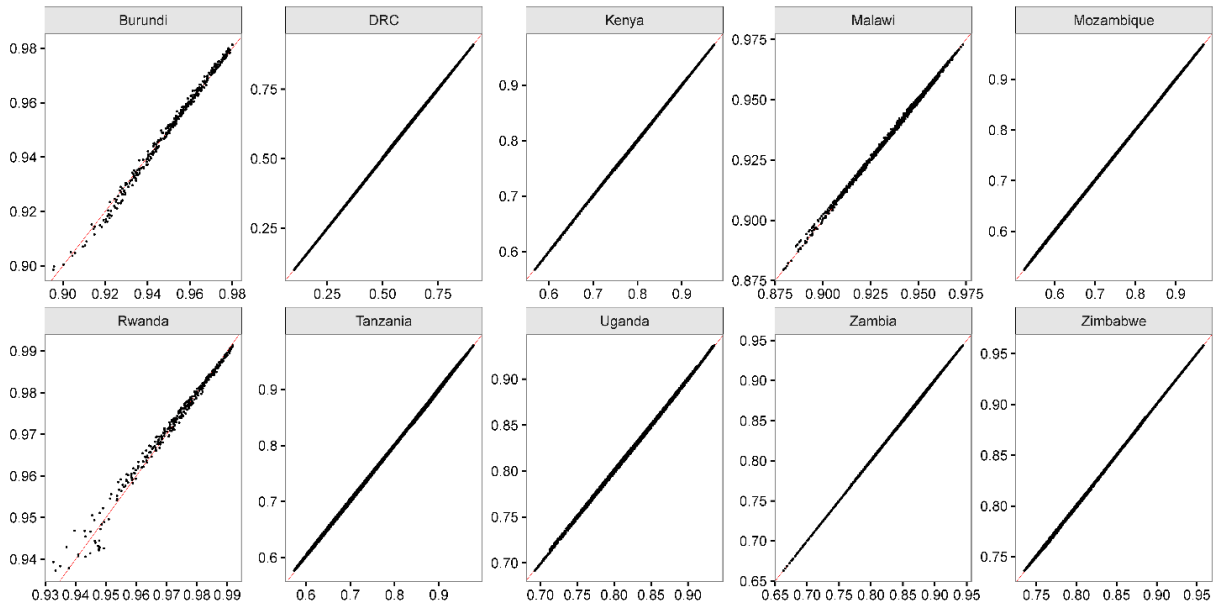

Supplementary Fig. 16: **Sensitivity analysis on the effect of DHS cluster displacement.** (a) Estimated marginal effect of DHS survey age (x-axis, in months between 6-60) by country on the probability of either receiving routine measles vaccination or being vaccinated during a national measles SIA campaign (y-axis) based on the full GAM model with randomly displaced cluster locations (i.e., up to 2 km in urban areas and up to 5 km in rural areas), with error bands showing +1 and -1 standard errors (blue). Estimate using the exact DHS cluster locations shown in black dotted line. (b) Estimated mean proportion of children 24 months of age who have either received routine measles vaccination or were vaccinated during a national measles SIA campaign, using the exact DHS cluster locations (x-axis) and the randomly displaced cluster locations (y-axis), at each 10 km by 10 km grid cell by country with the  $y = x$  line shown in red.

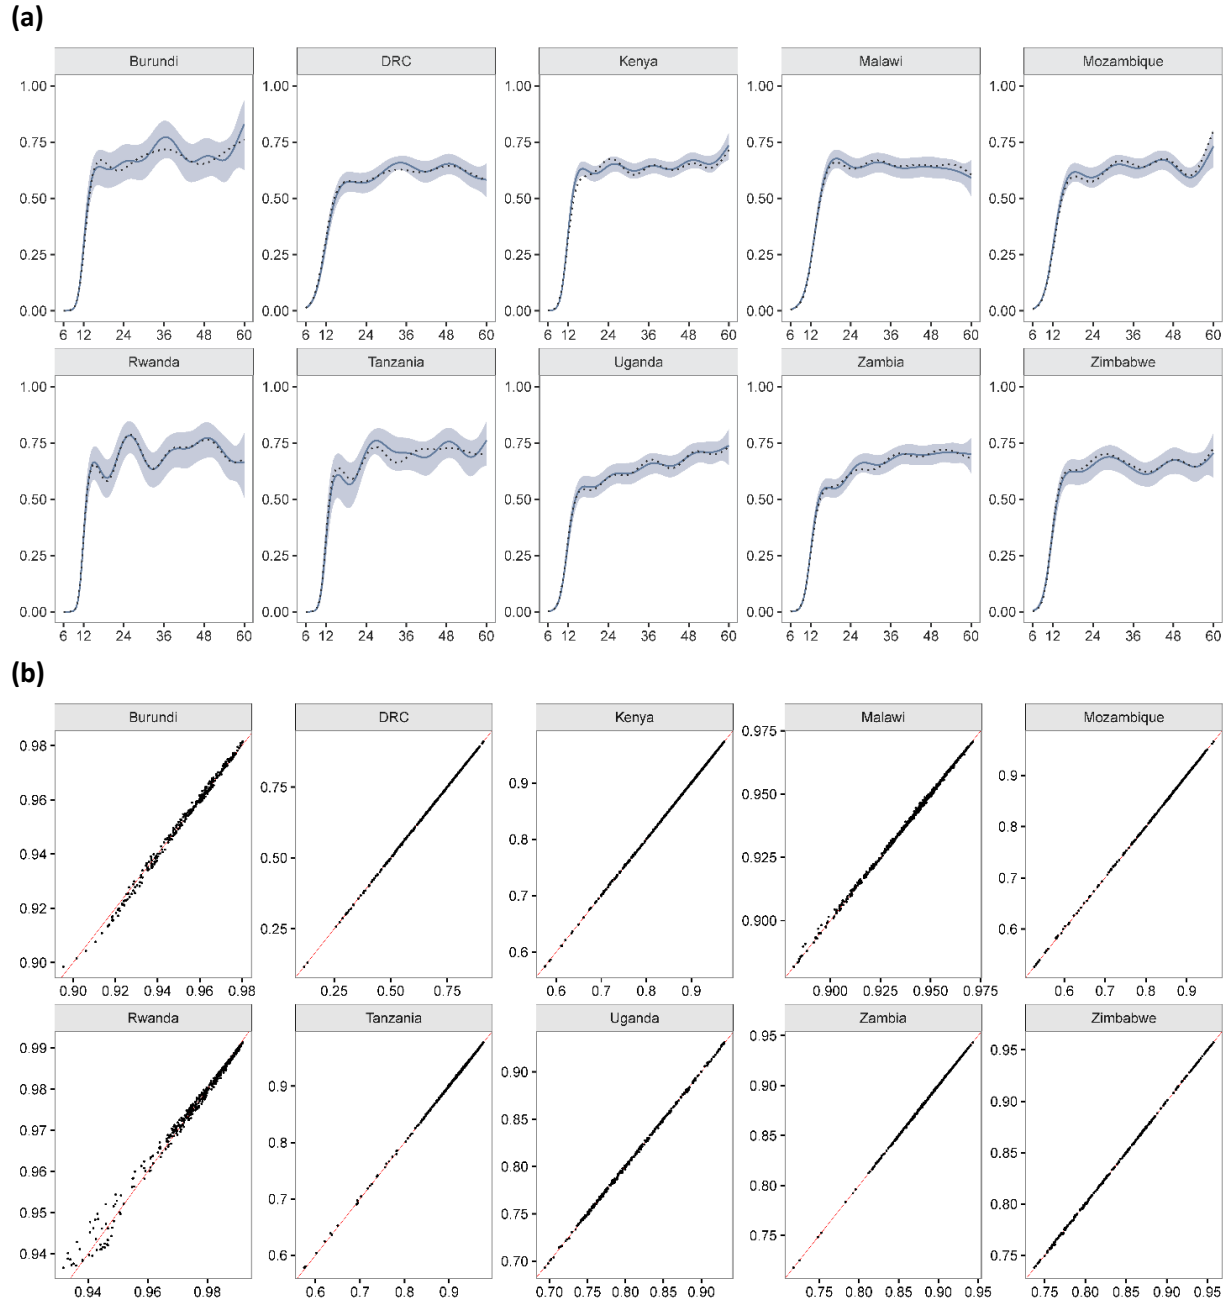

Supplementary Fig. 17: **Sensitivity analysis on the effect of DHS sample weights.** **(a)** Estimated marginal effect of DHS survey age (x-axis, in months between 6-60) by country on the probability of either receiving routine measles vaccination or being vaccinated during a national measles SIA campaign (y-axis) based on the full GAM model with DHS sample weights, with error bands showing +1 and -1 standard errors (blue). Estimate without DHS sample weights shown in black dotted line. **(b)** Estimated mean proportion of children 24 months of age who have either received routine measles vaccination or were vaccinated during a national measles SIA campaign, without the sample weights (x-axis) and with the sample weights (y-axis) at (exact) DHS cluster locations by country, with the  $y = x$  line shown in red.

## Supplementary Tables

Supplementary Table 1: **Description of full and comparison GAM models.**

| Model name                                            | Include covariate:<br><i>s(long, lat)</i> | Include covariate:<br><i>s(age)</i> | Include covariate:<br>eligibility for sub-national<br>SIAs, if available* |
|-------------------------------------------------------|-------------------------------------------|-------------------------------------|---------------------------------------------------------------------------|
| Full model†                                           | yes                                       | yes                                 | yes                                                                       |
| Comparison 1 (C1)                                     | yes                                       | yes                                 | no                                                                        |
| Comparison 2 (C2)                                     | yes                                       | no                                  | yes                                                                       |
| Comparison 3 (C3)                                     | yes                                       | no                                  | no                                                                        |
| Comparison 4 (C4)                                     | no                                        | yes                                 | yes                                                                       |
| Comparison 5 (C5)                                     | no                                        | yes                                 | no                                                                        |
| Comparison 6 (C6)                                     | no                                        | no                                  | yes                                                                       |
| Full model + DHS covariate<br>for urban or rural (C7) | yes                                       | yes                                 | yes                                                                       |

s: smoothed

\*Only Burundi, DRC, and Tanzania had sub-national SIA campaigns.

†This model was used in the main analysis.

Supplementary Table 2: **Akaike information criterion (AIC) of the full and comparison GAM models, by country.** Model descriptions are provided in Supplementary Table 1. The model (among only the full model or C1-C6) with lowest AIC value by country shown in bold.

| Country    | Full model<br>AIC | C1 model<br>AIC | C2 model<br>AIC | C3 model<br>AIC | C4 model<br>AIC | C5 model<br>AIC | C6 model<br>AIC | C7 model<br>AIC |
|------------|-------------------|-----------------|-----------------|-----------------|-----------------|-----------------|-----------------|-----------------|
| Burundi    | 2,431.83          | <b>2,430.05</b> | 4,978.28        | 5,062.39        | 2,459.63        | 2,460.67        | 5,026.27        | 2,431.06        |
| DRC        | <b>14,231.92</b>  | 14,307.97       | 15,875.87       | 16,986.26       | 15,068.11       | 15,706.76       | 16,752.33       | 14,174.32       |
| Kenya      | <b>13,244.94</b>  | -               | 18,204.77       | -               | 14,068.43       | -               | -               | 13,178.03       |
| Malawi     | <b>8,390.82</b>   | -               | 13,440.49       | -               | 8,491.48        | -               | -               | 8,385.98        |
| Mozambique | <b>6,809.57</b>   | -               | 9,277.98        | -               | 7,334.61        | -               | -               | 6,774.46        |
| Rwanda     | <b>2,517.33</b>   | -               | 5,723.17        | -               | 2,591.50        | -               | -               | 2,519.21        |
| Tanzania   | 4,303.83          | <b>4,302.17</b> | 5,982.36        | 6,556.27        | 4,581.09        | 4,583.94        | 6,308.20        | 4,295.56        |
| Uganda     | <b>5,565.23</b>   | -               | 7,347.91        | -               | 5,674.01        | -               | -               | 5,545.74        |
| Zambia     | <b>7,480.10</b>   | -               | 11,296.93       | -               | 7,566.84        | -               | -               | 7,455.93        |
| Zimbabwe   | <b>3,873.25</b>   | -               | 5,171.38        | -               | 3,999.49        | -               | -               | 3,874.30        |

Supplementary Table 3: **Output of the full GAM model, by country.**

| Country    | Estimated df:<br><i>s(long, lat)</i> | Estimated df:<br><i>s(age)</i> | Deviance explained | Adjusted R-squared |
|------------|--------------------------------------|--------------------------------|--------------------|--------------------|
| Burundi    | 18.1419                              | 8.3680                         | 0.5317             | 0.6027             |
| DRC        | 27.9888                              | 8.5248                         | 0.2220             | 0.2647             |
| Kenya      | 27.3561                              | 8.9196                         | 0.2995             | 0.3523             |
| Malawi     | 25.8808                              | 7.8971                         | 0.3852             | 0.4432             |
| Mozambique | 24.9005                              | 8.2645                         | 0.3011             | 0.3466             |
| Rwanda     | 19.4712                              | 8.9302                         | 0.5718             | 0.6356             |
| Tanzania   | 25.8883                              | 8.9314                         | 0.3709             | 0.4216             |
| Uganda     | 21.7424                              | 8.8351                         | 0.2589             | 0.3076             |
| Zambia     | 25.2158                              | 8.8154                         | 0.3477             | 0.4117             |
| Zimbabwe   | 19.4218                              | 8.6382                         | 0.2741             | 0.3275             |

df: degrees of freedom

s: smoothed

Supplementary Table 4: **Description and estimated marginal benefit of sub-national SIA campaigns (based on the full GAM model), by country.**

| Country | SIA date | Age target | Geographic target | Proportion of children in survey eligible for SIA* | Estimate of mean predictor (logit scale) | Standard error (logit scale) |
|---------|----------|------------|-------------------|----------------------------------------------------|------------------------------------------|------------------------------|
| Burundi | 10/2010  | 6-179 m    | Bujumbura         | 0.0853                                             | 0.2755                                   | 0.3398                       |
| DRC     | 11/2009  | 6-59 m     | Bas-Congo         | 0.0043                                             | 0.5053                                   | 0.6361                       |
| DRC     | 11/2009  | 6-59 m     | Kinshasa          | 0.0082                                             | 0.4206                                   | 0.5687                       |
| DRC     | 11/2009  | 6-59 m     | Nord Kivu         | 0.0059                                             | 0.2346                                   | 0.4465                       |
| DRC     | 01/2010  | 6-59 m     | Bandundu          | 0.0156                                             | 0.4558                                   | 0.2273                       |
| DRC     | 07/2011  | 6-59 m     | Kasaï-Occidental  | 0.0377                                             | 0.1817                                   | 0.1860                       |
| DRC     | 07/2011  | 6-59 m     | Kasaï-Oriental    | 0.0476                                             | 0.0619                                   | 0.1694                       |
| DRC     | 07/2011  | 6-59 m     | Katanga           | 0.0534                                             | 0.0152                                   | 0.1718                       |
| DRC     | 07/2011  | 6-59 m     | Maniema           | 0.0233                                             | 0.0685                                   | 0.2050                       |
| DRC     | 07/2011  | 6-59 m     | Sud Kivu          | 0.0270                                             | 0.6296                                   | 0.2635                       |
| DRC     | 09/2011  | 6-59 m     | Equateur          | 0.0700                                             | -0.1331                                  | 0.1666                       |
| DRC     | 09/2011  | 6-59 m     | Orientale         | 0.0501                                             | -0.0726                                  | 0.1823                       |
| DRC     | 12/2011  | 6-59 m     | Kinshasa          | 0.0346                                             | 0.9192                                   | 0.2875                       |
| DRC     | 01/2012  | 6-59 m     | Bas-Congo         | 0.0274                                             | 0.9483                                   | 0.2758                       |
| DRC     | 01/2012  | 6-59 m     | Nord Kivu         | 0.0348                                             | 0.4256                                   | 0.3684                       |
| DRC     | 01/2012  | 6-59 m     | Bandundu          | 0.0749                                             | -0.0948                                  | 0.1695                       |
| DRC     | 08/2012  | 6-59 m     | Nord Kivu         | 0.0418                                             | -0.0865                                  | 0.3422                       |
| DRC     | 09/2013  | 6-119 m    | Equateur          | 0.1366                                             | 0.1437                                   | 0.1776                       |
| DRC     | 09/2013  | 6-119 m    | Orientale         | 0.0952                                             | -0.1818                                  | 0.2110                       |
| DRC     | 12/2013  | 6-119 m    | Nord Kivu         | 0.0600                                             | 0.5052                                   | 0.2930                       |

| Country  | SIA date        | Age target | Geographic target  | Proportion of children in survey eligible for SIA* | Estimate of mean predictor (logit scale) | Standard error (logit scale) |
|----------|-----------------|------------|--------------------|----------------------------------------------------|------------------------------------------|------------------------------|
| DRC      | 12/2013         | 6-119 m    | Sud Kivu           | 0.0631                                             | 1.7833                                   | 0.2863                       |
| Tanzania | 08/2008-09/2008 | 6-131 m†   | All mainland areas | 0.5147                                             | -0.0907                                  | 0.1823                       |

m: months

\*Including only children that are 6-60 months of age at survey.

†Age target of 6-59 months in only Dar es Salaam.

Supplementary Table 5: **Estimates of country-specific predictors from the full GAM model of the ten countries together.** Other included covariates:  $s(long, lat)$ ,  $s(age)$ , and sub-national SIA eligibility.

| Country    | Estimate of mean predictor (logit scale) | Standard error (logit scale) |
|------------|------------------------------------------|------------------------------|
| Burundi    | 2.9891                                   | 0.1064                       |
| DRC        | 0.6088                                   | 0.0936                       |
| Kenya      | 1.2287                                   | 0.0860                       |
| Malawi     | 2.4245                                   | 0.0787                       |
| Mozambique | 1.2756                                   | 0.0876                       |
| Rwanda     | 2.6644                                   | 0.0971                       |
| Tanzania   | 1.5134                                   | 0.0878                       |
| Uganda     | 1.0737                                   | 0.0865                       |
| Zambia     | 1.6206                                   | 0.0738                       |
| Zimbabwe   | 0.6925                                   | 0.1269                       |

s: smoothed



**Supplementary Table 6: Estimated number of children who have neither received routine measles vaccination nor were vaccinated during a national measles SIA campaign, by country and age group.**  
 Estimates based on the full GAM model. 95% confidence intervals (CI) from the standard errors of GAM predictions.

| Country    | Number unvaccinated, 6-12 months (95% CI) | Number unvaccinated, 13-24 months (95% CI) | Number unvaccinated, 25-36 months (95% CI) | Number unvaccinated, 37-48 months (95% CI) | Number unvaccinated, 49-60 months (95% CI) | Total number of children, 6-60 months* |
|------------|-------------------------------------------|--------------------------------------------|--------------------------------------------|--------------------------------------------|--------------------------------------------|----------------------------------------|
| Burundi    | 139,114<br>(126,932-150,596)              | 17,001<br>(9,849-28,939)                   | 12,155<br>(6,744-21,679)                   | 12,488<br>(6,895-22,354)                   | 11,051<br>(5,750-21,236)                   | 1,542,120                              |
| DRC        | 1,024,030<br>(959,360-1,079,860)          | 729,968<br>(589,662-886,322)               | 611,387<br>(480,377-763,431)               | 588,916<br>(433,807-775,138)               | 606,058<br>(443,457-800,813)               | 10,248,244                             |
| Kenya      | 575,819<br>(550,785-599,366)              | 175,636<br>(142,779-214,440)               | 152,780<br>(123,009-188,408)               | 149,743<br>(120,514-184,767)               | 139,644<br>(110,770-174,838)               | 6,187,521                              |
| Malawi     | 211,895<br>(195,224-227,559)              | 41,438<br>(30,763-55,426)                  | 28,552<br>(20,575-39,429)                  | 29,465<br>(21,217-40,712)                  | 30,393<br>(21,599-42,532)                  | 2,501,513                              |
| Mozambique | 359,219<br>(332,237-383,671)              | 159,068<br>(123,725-202,450)               | 116,462<br>(87,784-153,099)                | 109,354<br>(82,009-144,546)                | 108,342<br>(79,859-145,860)                | 3,883,799                              |
| Rwanda     | 151,175<br>(141,118-161,096)              | 15,717<br>(8,957-27,349)                   | 11,749<br>(6,547-20,966)                   | 9,885<br>(5,383-18,074)                    | 11,554<br>(6,228-21,336)                   | 1,638,796                              |
| Tanzania   | 748,829<br>(702,158-791,194)              | 221,599<br>(151,861-319,736)               | 162,942<br>(100,024-259,952)               | 147,215<br>(89,274-238,008)                | 152,143<br>(90,836-249,071)                | 7,369,265                              |
| Uganda     | 603,727<br>(566,083-636,733)              | 301,336<br>(229,887-387,868)               | 226,445<br>(168,279-300,100)               | 199,863<br>(146,718-268,417)               | 164,581<br>(116,893-228,669)               | 6,027,976                              |
| Zambia     | 218,476<br>(206,822-229,031)              | 69,479<br>(52,598-90,639)                  | 46,473<br>(34,124-62,710)                  | 37,322<br>(26,955-51,274)                  | 35,795<br>(25,489-49,882)                  | 2,216,061                              |
| Zimbabwe   | 176,411<br>(163,622-187,497)              | 79,334<br>(57,321-107,291)                 | 63,176<br>(44,302-88,220)                  | 72,628<br>(51,608-99,870)                  | 65,659<br>(45,099-93,337)                  | 1,787,280                              |
| Total      | 4,208,695<br>(3,944,341-4,446,603)        | 1,810,576<br>(1,397,402-2,320,460)         | 1,432,121<br>(1,071,765-1,897,994)         | 1,356,879<br>(984,380-1,843,160)           | 1,325,220<br>(945,980-1,827,574)           | 43,402,575                             |

\*Data from the WorldPop project.

**Supplementary Table 7: Estimated proportion of children who have either received routine measles vaccination or were vaccinated during a national measles SIA campaign, by country and age group.** Estimates based on the full GAM model. 95% confidence intervals (CI) from the standard errors of GAM predictions.

| Country    | Proportion vaccinated, 6-12 months (95% CI) | Proportion vaccinated, 13-24 months (95% CI) | Proportion vaccinated, 25-36 months (95% CI) | Proportion vaccinated, 37-48 months (95% CI) | Proportion vaccinated, 49-60 months (95% CI) |
|------------|---------------------------------------------|----------------------------------------------|----------------------------------------------|----------------------------------------------|----------------------------------------------|
| Burundi    | 0.2912<br>(0.2327-0.3533)                   | 0.9495<br>(0.9140-0.9707)                    | 0.9639<br>(0.9356-0.9800)                    | 0.9629<br>(0.9336-0.9795)                    | 0.9672<br>(0.9369-0.9829)                    |
| DRC        | 0.2149<br>(0.1721-0.2645)                   | 0.6735<br>(0.6036-0.7363)                    | 0.7266<br>(0.6586-0.7852)                    | 0.7366<br>(0.6533-0.8060)                    | 0.7290<br>(0.6419-0.8017)                    |
| Kenya      | 0.2688<br>(0.2389-0.3006)                   | 0.8699<br>(0.8412-0.8942)                    | 0.8868<br>(0.8604-0.9089)                    | 0.8891<br>(0.8631-0.9107)                    | 0.8966<br>(0.8705-0.9179)                    |
| Malawi     | 0.3344<br>(0.2852-0.3868)                   | 0.9241<br>(0.8984-0.9436)                    | 0.9477<br>(0.9278-0.9623)                    | 0.9460<br>(0.9254-0.9611)                    | 0.9443<br>(0.9221-0.9604)                    |
| Mozambique | 0.2733<br>(0.2238-0.3279)                   | 0.8123<br>(0.7611-0.8540)                    | 0.8626<br>(0.8193-0.8964)                    | 0.8709<br>(0.8294-0.9032)                    | 0.8721<br>(0.8279-0.9058)                    |
| Rwanda     | 0.2752<br>(0.2276-0.3234)                   | 0.9560<br>(0.9235-0.9750)                    | 0.9671<br>(0.9414-0.9817)                    | 0.9724<br>(0.9495-0.9849)                    | 0.9677<br>(0.9403-0.9826)                    |
| Tanzania   | 0.2016<br>(0.1564-0.2514)                   | 0.8622<br>(0.8011-0.9055)                    | 0.8987<br>(0.8383-0.9378)                    | 0.9084<br>(0.8520-0.9445)                    | 0.9054<br>(0.8451-0.9435)                    |
| Uganda     | 0.2131<br>(0.1701-0.2621)                   | 0.7709<br>(0.7051-0.8252)                    | 0.8278<br>(0.7718-0.8721)                    | 0.8480<br>(0.7959-0.8884)                    | 0.8749<br>(0.8261-0.9111)                    |
| Zambia     | 0.2254<br>(0.1880-0.2667)                   | 0.8563<br>(0.8125-0.8912)                    | 0.9039<br>(0.8703-0.9294)                    | 0.9228<br>(0.8940-0.9443)                    | 0.9260<br>(0.8968-0.9473)                    |
| Zimbabwe   | 0.2245<br>(0.1757-0.2807)                   | 0.7966<br>(0.7249-0.8530)                    | 0.8380<br>(0.7738-0.8864)                    | 0.8138<br>(0.7439-0.8677)                    | 0.8316<br>(0.7606-0.8843)                    |

Supplementary Table 8: **Estimated number of children 6-24 months of age and 6-60 months of age in Burundi, DRC, and Tanzania who have neither received routine measles vaccination nor were vaccinated during a national or sub-national measles SIA campaign.** Estimates based on the full GAM model. 95% confidence intervals (CI) from the standard errors of GAM predictions.

| Country (with sub-national SIA) | Number of unvaccinated children, 6-24 months of age (95% CI) | Number of unvaccinated children, 6-60 months of age (95% CI) |
|---------------------------------|--------------------------------------------------------------|--------------------------------------------------------------|
| Burundi                         | 154,916<br>(135,561-178,305)                                 | 189,629<br>(154,336-242,114)                                 |
| DRC                             | 1,679,100<br>(1,511,994-1,852,786)                           | 3,245,001<br>(2,773,054-3,782,748)                           |
| Tanzania                        | 973,908<br>(855,648-1,117,310)                               | 1,472,121<br>(1,186,952-1,860,182)                           |

Supplementary Table 9: **DHS data processing.** Total number of children included in DHS survey by country (ALL), with additional filtering for having a known GPS location (GPS), complete date of birth (DOB), survey age of between 6-60 months of age (AGE), and known measles vaccination status (VACC).

| Country    | Total number of children in DHS survey (ALL) | Number of children: ALL + GPS | Number of children: ALL + GPS + DOB | Number of children: ALL + GPS + DOB + AGE | Number of children: ALL + GPS + DOB + AGE + VACC* |
|------------|----------------------------------------------|-------------------------------|-------------------------------------|-------------------------------------------|---------------------------------------------------|
| Burundi    | 7,742                                        | 7,742                         | 7,742                               | 7,160                                     | 6,661                                             |
| DRC        | 17,199                                       | 17,199                        | 17,199                              | 15,647                                    | 14,321                                            |
| Kenya      | 20,851                                       | 20,851                        | 20,851                              | 19,300                                    | 18,311                                            |
| Malawi     | 19,365                                       | 19,365                        | 19,365                              | 17,920                                    | 16,379                                            |
| Mozambique | 11,089                                       | 11,089                        | 11,089                              | 10,180                                    | 9,369                                             |
| Rwanda     | 8,997                                        | 8,997                         | 8,997                               | 8,397                                     | 7,883                                             |
| Tanzania   | 7,740                                        | 7,740                         | 7,740                               | 7,076                                     | 6,592                                             |
| Uganda     | 7,763                                        | 7,763                         | 7,763                               | 7,098                                     | 6,580                                             |
| Zambia     | 13,412                                       | 13,412                        | 13,412                              | 12,424                                    | 11,659                                            |
| Zimbabwe   | 5,370                                        | 5,370                         | 5,370                               | 4,834                                     | 4,494                                             |

\*This column matches with numbers of children provided in Table 1.

Supplementary Table 10: **Distribution of population density of children by country, from the WorldPop project.**

| Country    | Total number of 10 km by 10 km grid cells | Number of grid cells with at least 100 children under 60 months of age | Number of grid cells with at least 500 children under 60 months of age | Number of grid cells with at least 1,000 children under 60 months of age |
|------------|-------------------------------------------|------------------------------------------------------------------------|------------------------------------------------------------------------|--------------------------------------------------------------------------|
| Burundi    | 372                                       | 333                                                                    | 323                                                                    | 308                                                                      |
| DRC        | 27,937                                    | 19,064                                                                 | 4,162                                                                  | 1,427                                                                    |
| Kenya      | 7,080                                     | 3,885                                                                  | 1,769                                                                  | 1,232                                                                    |
| Malawi     | 1,587                                     | 1,173                                                                  | 1,036                                                                  | 857                                                                      |
| Mozambique | 10,121                                    | 6,840                                                                  | 2,217                                                                  | 652                                                                      |
| Rwanda     | 350                                       | 320                                                                    | 285                                                                    | 267                                                                      |
| Tanzania   | 11,394                                    | 6,670                                                                  | 3,732                                                                  | 2,304                                                                    |
| Uganda     | 2,960                                     | 2,387                                                                  | 1,862                                                                  | 1,486                                                                    |
| Zambia     | 9,356                                     | 5,447                                                                  | 637                                                                    | 226                                                                      |
| Zimbabwe   | 5,008                                     | 3,706                                                                  | 905                                                                    | 137                                                                      |

Supplementary Table 11: **Description of national SIA campaigns, by country.**

| Country    | SIA date | Age target | Proportion of children in survey eligible for SIA* |
|------------|----------|------------|----------------------------------------------------|
| Burundi    | 11/2005  | 0-11 m     | 0.0089                                             |
| Burundi    | 06/2006  | 9-59 m     | 0.0001                                             |
| Burundi    | 06/2009  | 6-59 m     | 0.6676                                             |
| Burundi    | 06/2010  | 6-59 m     | 0.8988                                             |
| Kenya      | 11/2012  | 9-59 m     | 0.5539                                             |
| Malawi     | 10/2008  | 9-59 m     | 0.5247                                             |
| Malawi     | 08/2010  | 9-191 m    | 0.9330                                             |
| Mozambique | 10/2008  | 9-59 m     | 0.2758                                             |
| Mozambique | 05/2011  | 6-59 m     | 0.9163                                             |
| Rwanda     | 09/2006  | 9-59 m     | 0.0098                                             |
| Rwanda     | 10/2009  | 9-59 m     | 0.6897                                             |
| Uganda     | 06/2009  | 9-47 m     | 0.4377                                             |
| Zambia     | 07/2010  | 9-47 m     | 0.1931                                             |
| Zambia     | 09/2012  | 9-179 m    | 0.6571                                             |
| Zimbabwe   | 06/2009  | 9-59 m     | 0.5416                                             |
| Zimbabwe   | 05/2010  | 6-179 m    | 0.8247                                             |

m: months

\*Including only children that are 6-60 months of age at time of DHS survey.

Supplementary Table 12: **WHO/UNICEF Estimates of National Immunization Coverage (WUENIC) of the first dose of measles-containing vaccine (MCV-1) by country between 2008-2014.** DHS survey year(s) for each country highlighted in yellow.

| Country    | 2014 | 2013 | 2012 | 2011 | 2010 | 2009 | 2008 |
|------------|------|------|------|------|------|------|------|
| Burundi    | 94   | 98   | 93   | 93   | 92   | 91   | 84   |
| DRC        | 77   | 76   | 72   | 74   | 74   | 72   | 64   |
| Kenya      | 79   | 73   | 93   | 87   | 86   | 88   | 90   |
| Malawi     | 85   | 88   | 90   | 96   | 93   | 92   | 88   |
| Mozambique | 85   | 85   | 82   | 82   | 82   | 80   | 77   |
| Rwanda     | 97   | 95   | 97   | 95   | 95   | 95   | 92   |
| Tanzania   | 99   | 99   | 97   | 93   | 92   | 91   | 88   |
| Uganda     | 82   | 82   | 82   | 75   | 73   | 77   | 70   |
| Zambia     | 85   | 80   | 82   | 83   | 96   | 90   | 87   |
| Zimbabwe   | 92   | 93   | 97   | 92   | 90   | 76   | 70   |

Source: [http://apps.who.int/immunization\\_monitoring/globalsummary/timeseries/tswucoveragemcv1.html](http://apps.who.int/immunization_monitoring/globalsummary/timeseries/tswucoveragemcv1.html)
